# Supplementary material for: Statin Discontinuation and Cardiovascular Events Among Older People in Denmark
Source: PubMed Central journal article supplement (PMC8640890; doi:10.1001/jamanetworkopen.2021.36802), 2021-12-02
Supplement: jamanetwopen-e2136802-s001.pdf [file jamanetwopen-e2136802-s001.pdf]

## Supplemental Online Content

Thompson W, Morin L, Jarbøl DE, et al. Statin discontinuation and cardiovascular events among older people in Denmark. *JAMA Netw Open*. 2021;4(12):e2136802. doi:10.1001/jamanetworkopen.2021.36802

**eTable 1.** Anatomical Therapeutic Chemical codes used in the study

**eTable 2.** International Classification of Diseases codes used in the study

**eTable 3.** Surgical procedure codes used in the study

**eTable 4.** Statin intensity (based on American College of Cardiologists 2018 guidelines)

**eFigure 1.** Cohort design

**eFigure 2.** Propensity score distribution in the primary prevention cohort

**eFigure 3.** Propensity score distribution in the secondary prevention cohort

**eTable 5.** Balance of covariates in primary prevention cohort

**eTable 6.** Balance of covariates in secondary prevention cohort

**eTable 7.** Summary of results with grace period of 90 days

**eTable 8.** Summary of results with grace period of 30 days

**eTable 9.** Summary of results with medication possession ratio threshold of  $\geq 80\%$

**eTable 10.** Summary of results with medication possession ratio threshold of  $\geq 90\%$

**eTable 11.** Summary of results with no medication possession ratio threshold

**eTable 12.** Summary of results using high dimensional propensity score in inverse probability of treatment weighting procedure

**eTable 13.** Revascularization outcome broken down by PCI and CABG

**eTable 14.** General Practitioner (GP) contacts each year of follow-up

**eTable 15.** Crude incidence of mortality for causes other than MI and ischemic stroke

**eTable 16.** Other cardiovascular medication use approaching statin discontinuation date in statin discontinuation group

**eTable 17.** Crude incidence of MACE each year of follow-up

**eTable 18.** Summary of results for all-cause and non-cardiovascular mortality

**eTable 19.** Summary of results for negative control outcome (hip fracture)

**eTable 20.** Summary of results sex-stratified MACE analysis

This supplemental material has been provided by the authors to give readers additional information about their work.

**eTable 1. Anatomical Therapeutic Chemical codes used in the study.**

| Medication class                 | ATC code(s)                                                                                                                                                                                                           |
|----------------------------------|-----------------------------------------------------------------------------------------------------------------------------------------------------------------------------------------------------------------------|
| Statins                          | C10AA, C10BA02, C10BA05                                                                                                                                                                                               |
| Low dose ASA                     | B01AC06                                                                                                                                                                                                               |
| ADP inhibitors                   | B01AC04, B01AC05, B01AC22, B01AC24, B01AC25                                                                                                                                                                           |
| Anticoagulants (warfarin, NOACs) | B01AA03, B01AE07, B01AF01, B01AF02, B01AF03                                                                                                                                                                           |
| Thiazides                        | C03AA, C03AB                                                                                                                                                                                                          |
| Spironolactone                   | C03DA01                                                                                                                                                                                                               |
| Beta-blockers                    | C07A                                                                                                                                                                                                                  |
| ACE inhibitors/ARBS              | C09A, C09B, C09C, C09D                                                                                                                                                                                                |
| Calcium channel blockers         | C08CA, C08D                                                                                                                                                                                                           |
| Antidepressants                  | N06A                                                                                                                                                                                                                  |
| Antipsychotics                   | N05A (except N05AN)                                                                                                                                                                                                   |
| Non-selective NSAIDs             | M01A (except M01AH, M01AX05, M01AX25)                                                                                                                                                                                 |
| COX-2 inhibitors                 | M01AH                                                                                                                                                                                                                 |
| COPD medications*                | R03AC12, R03AC13, R03AC1, R03AC19, R03CC12, R03BB04, R03BB05, R03BB06, R03BB07, R03BA01, R03BA02, R03BA03, R03BA05, R03BA07, R03BA08, R03AK06, R03AK07, R03AK08, R03AK10, R03AK11, R03AL03, R03AL04, R03AL05, R03AL06 |
| Diabetes medications*            | A10B, A10A                                                                                                                                                                                                            |
| Dementia medications*            | N06DA, N06DX01                                                                                                                                                                                                        |

\* Only used for disease definitions

**Abbreviations:** ACE = angiotensin converting enzyme; ADP = adenosine diphosphate receptor; ARB = angiotensin receptor blocker; ASA = acetylsalicylic acid; ATC = anatomical therapeutic chemical; COPD = chronic obstructive pulmonary disease; COX-2 = cyclooxygenase-2; NOAC = new oral anticoagulant; NSAID = non-steroidal anti-inflammatory drugs; SMD = standardized mean difference

**eTable 2. International Classification of Diseases codes used in the study.**

| <b>Disease</b>                | <b>ICD-10 code</b>                                                                         |
|-------------------------------|--------------------------------------------------------------------------------------------|
| MI                            | I21 I22 I23                                                                                |
| Ischemic stroke/TIA           | I63 G45                                                                                    |
| Ischemic heart disease/angina | I20 I25                                                                                    |
| Peripheral artery disease     | I739, I702                                                                                 |
| “Secondary prevention”        | Any of: MI, ischemic stroke/TIA, ischemic heart disease/ angina, peripheral artery disease |
| Dementia                      | F01, F02, F03, G30, G310, G3183, use of dementia medication (see above)                    |
| Diabetes                      | E10, E11, use of diabetes medication (see above)                                           |
| Atrial fibrillation/flutter   | I48                                                                                        |
| Hypertension                  | I10, I11, I12, I13, I14, I15                                                               |
| Parkinson’s disease           | G20                                                                                        |
| COPD                          | J41, J42, J43, J44, use of COPD medication (see above)                                     |
| Depression                    | F32, F33                                                                                   |
| Schizophrenia                 | F20                                                                                        |
| Cancer                        | C00 to C96                                                                                 |
| Heart failure                 | I50, I110, I130, I132                                                                      |

Abbreviations: COPD = chronic obstructive pulmonary disease; ICD = international classification of diseases; MI = myocardial infarction; TIA = transient ischemic attack

**eTable 3. Surgical procedure codes used in the study.**

| <b>Procedure</b>                   | <b>Code</b>       |
|------------------------------------|-------------------|
| Percutaneous coronary intervention | KFNG, KFNF        |
| Coronary artery bypass graft       | KFNA-KFNE, KFNH20 |

**eTable 4. Statin intensity (based on American College of Cardiologists 2018 guidelines).**

| <b>Statin</b>          | <b>High intensity</b> | <b>Low/moderate</b> |
|------------------------|-----------------------|---------------------|
| Atorvastatin (C10AA05) | 40 to 80 mg/day       | 10 to 20 mg/day     |
| Fluvastatin (C10AA04)  | -                     | 20 to 80 mg/day     |
| Lovastatin (C10AA02)   | -                     | 20 to 40 mg/day     |
| Pravastatin (C10AA03)  | -                     | 10 to 80 mg/day     |
| Rosuvastatin (C10AA07) | 20 to 40 mg/day       | 5 to 10 mg/day      |
| Simvastatin (C10AA01)  | -                     | 10 to 40 mg/day     |

eFigure 1. Cohort design.

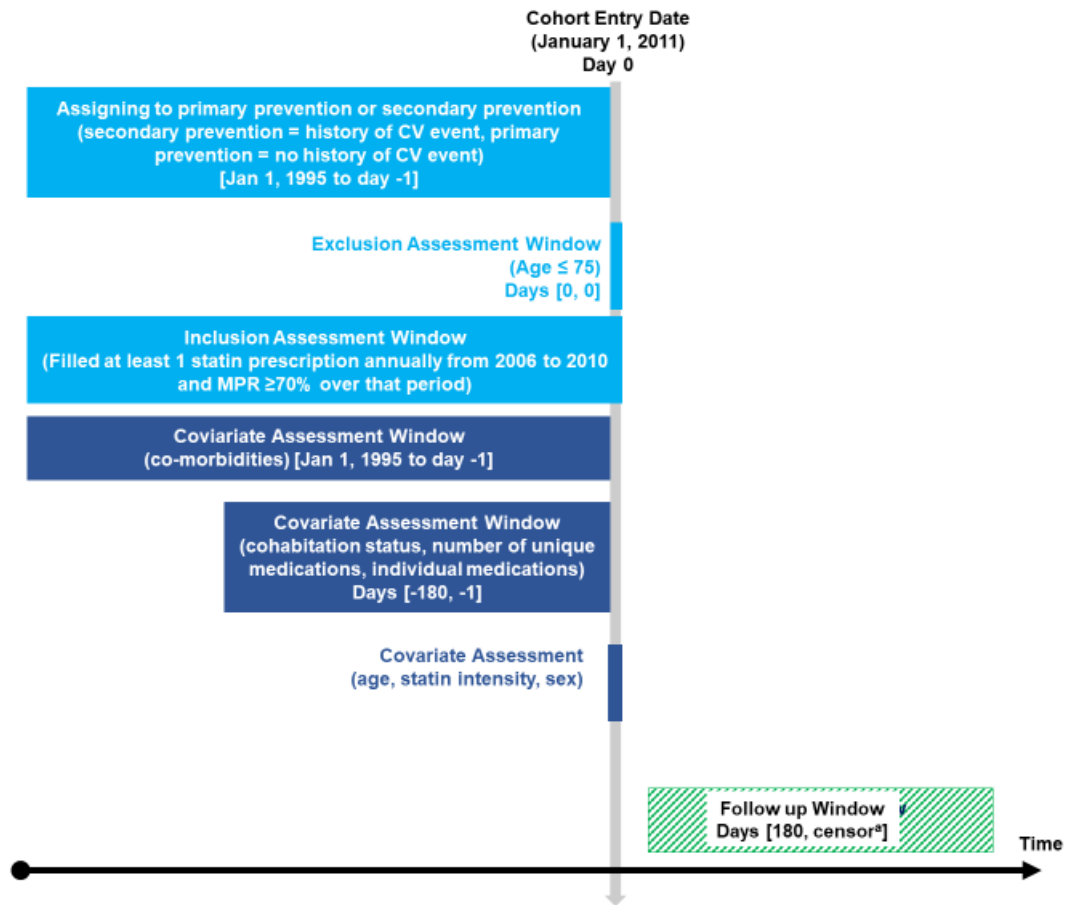

a. Censored if experienced outcome of interest, discontinued then restarted statin, competing event (death), or end of study period

**eFigure 2. Propensity Score Distribution in the Primary Prevention Cohort.**

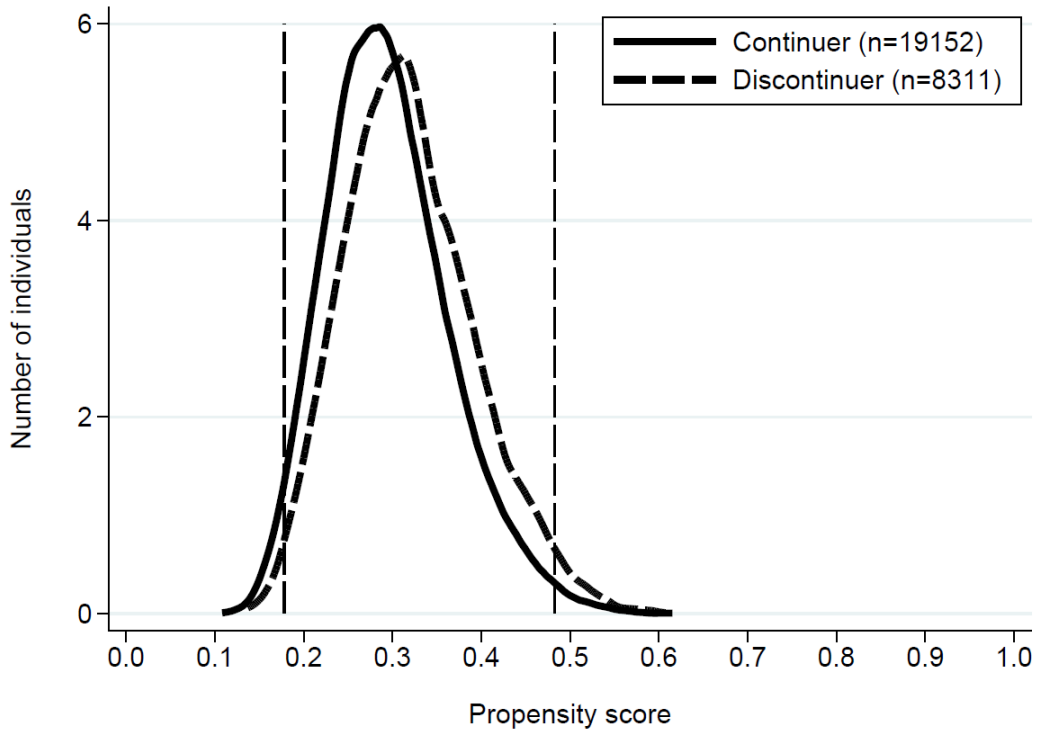

**eFigure 3. Propensity Score Distribution in the Secondary Prevention Cohort.**

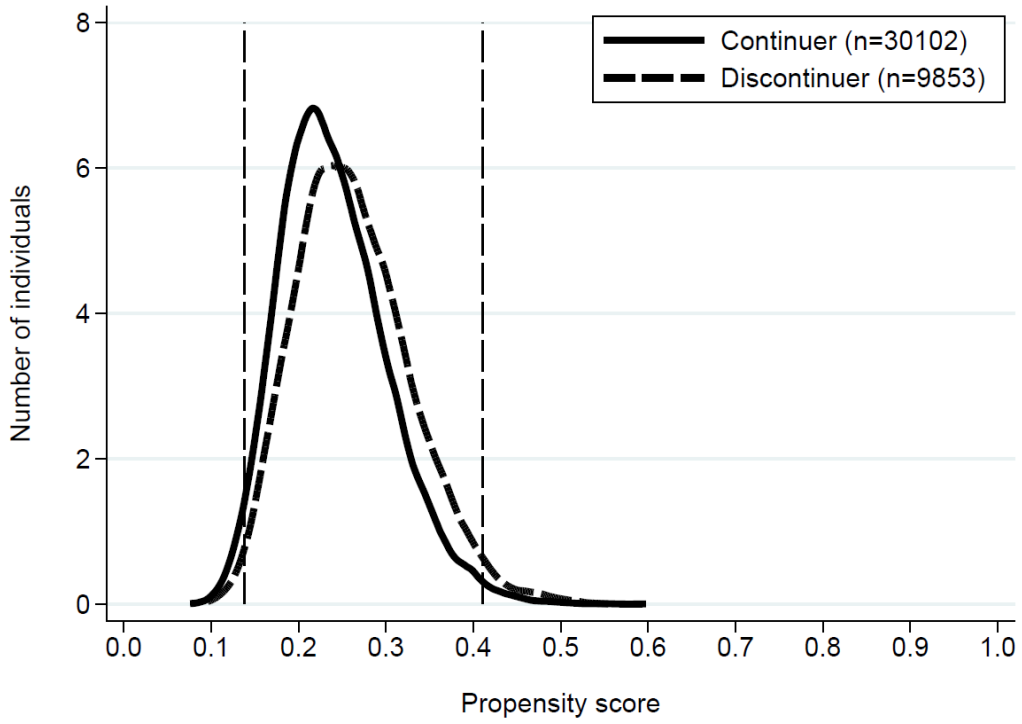



**eTable 5. Balance of Covariates in Primary Prevention Cohort.**

|                               | Before weighting |                 |               |      | After weighting |               |      |
|-------------------------------|------------------|-----------------|---------------|------|-----------------|---------------|------|
|                               | Overall          | Discontinuation | Continuation  | SMD  | Discontinuation | Continuation  | SMD  |
|                               | (n=27,463)       | (n=8,311)       | (n=19,152)    |      | (n=8,310)       | (n=19,153)    |      |
| <b>Sex (n,%)</b>              |                  |                 |               |      |                 |               |      |
| Female                        | 18,134 (66.0)    | 5,854 (70.4)    | 12,280 (64.1) | 0.03 | 5,487 (66.0)    | 12,648 (66.0) | 0.00 |
| Male                          | 9,329 (34.0)     | 2,457 (29.6)    | 6,872 (35.9)  | 0.01 | 2,823 (34.0)    | 6,506 (34.0)  | 0.00 |
| <b>Age</b>                    |                  |                 |               |      |                 |               |      |
| Median (IQR)                  | 79 (77-83)       | 80 (77-83)      | 79 (76-82)    | 0.22 | 79 (77-83)      | 79 (77-83)    | 0.00 |
| 75-84 y (n,%)                 | 23,233 (84.6)    | 6,704 (80.7)    | 16,529 (86.3) | 0.04 | 7,049 (84.8)    | 16,169 (84.4) | 0.01 |
| ≥85 y (n,%)                   | 4,230 (15.4)     | 1,607 (19.3)    | 2,623 (13.7)  | 0.04 | 1,261 (15.2)    | 2,984 (15.6)  | 0.01 |
| <b>Statin intensity (n,%)</b> |                  |                 |               |      |                 |               |      |
| Low/moderate                  | 26,408 (96.2)    | 8,027 (96.6)    | 18,381 (96.0) | 0.07 | 7,995 (96.2)    | 18,420 (96.2) | 0.00 |
| High                          | 1,055 (3.8)      | 284 (3.4)       | 771 (4.0)     | 0.06 | 315 (3.8)       | 734 (3.8)     | 0.00 |
| <b>Unique medications</b>     |                  |                 |               |      |                 |               |      |
| Median (IQR)                  | 6 (4-9)          | 6 (4-8)         | 6 (4-9)       | 0.05 | 6 (4-9)         | 6 (4-9)       | 0.02 |
| 0-4                           | 8,885 (32.4)     | 2,866 (34.5)    | 6,019 (31.4)  | 0.06 | 2,691 (32.4)    | 6,172 (32.2)  | 0.00 |
| 5-9                           | 13,366 (48.7)    | 3,935 (47.3)    | 9,431 (49.2)  | 0.10 | 4,006 (48.2)    | 9,352 (48.8)  | 0.01 |
| ≥10                           | 5,212 (19.0)     | 1,510 (18.2)    | 3,702 (19.3)  | 0.06 | 1,613 (19.4)    | 3,629 (18.9)  | 0.01 |
| <b>Comorbidities, (n,%)</b>   |                  |                 |               |      |                 |               |      |
| Dementia                      | 2,858 (10.4)     | 1,098 (13.2)    | 1,760 (9.2)   | 0.02 | 870 (10.5)      | 1,999 (10.4)  | 0.00 |
| Diabetes                      | 9,524 (34.7)     | 2,539 (30.5)    | 6,985 (36.5)  | 0.06 | 2,885 (34.7)    | 6,643 (34.7)  | 0.00 |
| Atrial fibrillation / flutter | 2,819 (10.3)     | 777 (9.3)       | 2,042 (10.7)  | 0.09 | 853 (10.3)      | 1,967 (10.3)  | 0.00 |
| Heart failure                 | 1,186 (4.3)      | 337 (4.1)       | 849 (4.4)     | 0.13 | 361 (4.3)       | 829 (4.3)     | 0.00 |
| Hypertension                  | 9,347 (34.0)     | 2,752 (33.1)    | 6,595 (34.4)  | 0.06 | 2,845 (34.2)    | 6,528 (34.1)  | 0.00 |
| Parkinson's                   | 196 (0.7)        | 75 (0.9)        | 121 (0.6)     | 0.19 | 60 (0.7)        | 137 (0.7)     | 0.00 |
| COPD                          | 5,691 (20.7)     | 1,730 (20.8)    | 3,961 (20.7)  | 0.08 | 1,722 (20.7)    | 3,970 (20.7)  | 0.00 |
| Depression                    | 565 (2.1)        | 189 (2.3)       | 376 (2.0)     | 0.07 | 174 (2.1)       | 396 (2.1)     | 0.00 |
| Schizophrenia                 | (n<10)           | (n<10)          | (n<10)        | .    | (n<5)           | (n<5)         | 0.01 |
| Cancer                        | 4,687 (17.1)     | 1,399 (16.8)    | 3,288 (17.2)  | 0.07 | 1,420 (17.1)    | 3,269 (17.1)  | 0.00 |
| <b>Medications (n,%)</b>      |                  |                 |               |      |                 |               |      |
| Low dose ASA                  | 12,480 (45.4)    | 3,549 (42.7)    | 8,931 (46.6)  | 0.07 | 3,785 (45.5)    | 8,708 (45.5)  | 0.00 |
| ADP inhibitors                | 297 (1.1)        | 93 (1.1)        | 204 (1.1)     | 0.27 | 90 (1.1)        | 208 (1.1)     | 0.00 |
| Anticoagulants                | 2,304 (8.4)      | 583 (7.0)       | 1,721 (9.0)   | 0.05 | 695 (8.4)       | 1,608 (8.4)   | 0.00 |
| Thiazides                     | 7,796 (28.4)     | 2,314 (27.8)    | 5,482 (28.6)  | 0.09 | 2,360 (28.4)    | 5,437 (28.4)  | 0.00 |
| Spironolactone                | 901 (3.3)        | 256 (3.1)       | 645 (3.4)     | 0.13 | 270 (3.2)       | 627 (3.3)     | 0.00 |
| Beta-blockers                 | 7,432 (27.1)     | 2,063 (24.8)    | 5,369 (28.0)  | 0.05 | 2,244 (27.0)    | 5,180 (27.0)  | 0.00 |
| ACE/ARB                       | 16,297 (59.3)    | 4,651 (56.0)    | 11,646 (60.8) | 0.08 | 4,936 (59.4)    | 11,368 (59.4) | 0.00 |
| CCBs                          | 10,122 (36.9)    | 2,849 (34.3)    | 7,273 (38.0)  | 0.10 | 3,070 (36.9)    | 7,064 (36.9)  | 0.00 |
| Antidepressants               | 4,374 (15.9)     | 1,369 (16.5)    | 3,005 (15.7)  | 0.08 | 1,331 (16.0)    | 3,058 (16.0)  | 0.00 |
| Antipsychotics                | 678 (2.5)        | 194 (2.3)       | 484 (2.5)     | 0.03 | 207 (2.5)       | 474 (2.5)     | 0.00 |

|                                  |               |              |               |      |              |               |      |
|----------------------------------|---------------|--------------|---------------|------|--------------|---------------|------|
| NSAIDs (non-selective)           | 3,789 (13.8)  | 1,163 (14.0) | 2,626 (13.7)  | 0.06 | 1,148 (13.8) | 2,642 (13.8)  | 0.00 |
| COX-2 inhibitors                 | 38 (0.1)      | 10 (0.1)     | 28 (0.1)      | 0.20 | 11 (0.1)     | 26 (0.1)      | 0.00 |
| <b>Cohabitation status (n,%)</b> |               |              |               |      |              |               |      |
| Alone                            | 12,559 (45.7) | 3,603 (43.4) | 8,956 (46.8)  | .    | 3,794 (45.7) | 8,753 (45.7)  | 0.00 |
| Cohabiting                       | 14,904 (54.3) | 4,708 (56.6) | 10,196 (53.2) | .    | 4,516 (54.3) | 10,400 (54.3) | 0.00 |

**Abbreviations:** ACE = angiotensin converting enzyme; ADP = adenosine diphosphate receptor; ARB = angiotensin receptor blocker; ASA = acetylsalicylic acid; CCB = calcium channel blocker; COPD = chronic obstructive pulmonary disease; COX-2 = cyclooxygenase-2; IQR = interquartile range; NSAID = non-steroidal anti-inflammatory drugs; SMD = standardized mean difference

**eTable 6. Balance of Covariates in Secondary Prevention Cohort.**

|                               | Before weighting |                 |               |      | After weighting |               |      |
|-------------------------------|------------------|-----------------|---------------|------|-----------------|---------------|------|
|                               | Overall          | Discontinuation | Continuation  | SMD  | Discontinuation | Continuation  | SMD  |
|                               | (n=39,955)       | (n=9,853)       | (n=30,102)    |      | (n=9,855)       | (n=30,102)    |      |
| <b>Sex (n,%)</b>              |                  |                 |               |      |                 |               |      |
| Female                        | 18,717 (46.8)    | 5,261 (53.4)    | 13,456 (44.7) | 0.05 | 4,606 (46.7)    | 14,098 (46.8) | 0.00 |
| Male                          | 21,238 (53.2)    | 4,592 (46.6)    | 16,646 (55.3) | 0.01 | 5,249 (53.3)    | 16,005 (53.2) | 0.00 |
| <b>Age</b>                    |                  |                 |               |      |                 |               |      |
| Median (IQR)                  | 80 (77-84)       | 81 (78-85)      | 80 (77-83)    | 0.19 | 80 (77-84)      | 80 (77-84)    | 0.00 |
| 75-84 y (n,%)                 | 31,931 (79.9)    | 7,372 (74.8)    | 24,559 (81.6) | 0.05 | 7,837 (79.5)    | 24,109 (80.1) | 0.01 |
| ≥85 y (n,%)                   | 8,024 (20.1)     | 2,481 (25.2)    | 5,543 (18.4)  | 0.10 | 2,018 (20.5)    | 5,993 (19.9)  | 0.01 |
| <b>Statin intensity (n,%)</b> |                  |                 |               |      |                 |               |      |
| Low/moderate                  | 37,469 (93.8)    | 9,376 (95.2)    | 28,093 (93.3) | 0.10 | 9,239 (93.7)    | 28,229 (93.8) | 0.00 |
| High                          | 2,486 (6.2)      | 477 (4.8)       | 2,009 (6.7)   | 0.01 | 616 (6.3)       | 1,873 (6.2)   | 0.00 |
| <b>Unique medications</b>     |                  |                 |               |      |                 |               |      |
| Median (IQR)                  | 8 (5-11)         | 8 (5-11)        | 8 (5-11)      | 0.04 | 8 (5-11)        | 8 (5-11)      | 0.01 |
| 0-4                           | 6,905 (17.3)     | 1,855 (18.8)    | 5,050 (16.8)  | 0.08 | 1,732 (17.6)    | 5,162 (17.1)  | 0.01 |
| 5-9                           | 19,605 (49.1)    | 4,795 (48.7)    | 14,810 (49.2) | 0.09 | 4,770 (48.4)    | 14,845 (49.3) | 0.02 |
| ≥10                           | 13,445 (33.7)    | 3,203 (32.5)    | 10,242 (34.0) | 0.13 | 3,354 (34.0)    | 10,095 (33.5) | 0.01 |
| <b>Comorbidities, n(%)</b>    |                  |                 |               |      |                 |               |      |
| Dementia                      | 4,108 (10.3)     | 1,313 (13.3)    | 2,795 (9.3)   | 0.10 | 1,022 (10.4)    | 3,102 (10.3)  | 0.00 |
| Diabetes                      | 11,702 (29.3)    | 2,575 (26.1)    | 9,127 (30.3)  | 0.09 | 2,900 (29.4)    | 8,822 (29.3)  | 0.00 |
| Atrial fibrillation / flutter | 9,079 (22.7)     | 2,077 (21.1)    | 7,002 (23.3)  | 0.09 | 2,267 (23.0)    | 6,849 (22.8)  | 0.01 |
| Heart failure                 | 8,373 (21.0)     | 1,873 (19.0)    | 6,500 (21.6)  | 0.16 | 2,076 (21.1)    | 6,312 (21.0)  | 0.00 |
| Hypertension                  | 21,903 (54.8)    | 5,344 (54.2)    | 16,559 (55.0) | 0.10 | 5,401 (54.8)    | 16,500 (54.8) | 0.00 |
| Parkinson's                   | 412 (1.0)        | 105 (1.1)       | 307 (1.0)     | 0.01 | 104 (1.1)       | 311 (1.0)     | 0.00 |
| COPD                          | 11,286 (28.2)    | 2,708 (27.5)    | 8,578 (28.5)  | 0.10 | 2,800 (28.4)    | 8,509 (28.3)  | 0.00 |
| Depression                    | 1,551 (3.9)      | 405 (4.1)       | 1,146 (3.8)   | 0.17 | 384 (3.9)       | 1,170 (3.9)   | 0.00 |
| Schizophrenia                 | 16 (0.0)         | (n<10)          | (n<10)        | 0.21 | (n<5)           | 12 (0.0)      | 0.00 |
| Cancer                        | 7,254 (18.2)     | 1,738 (17.6)    | 5,516 (18.3)  | 0.11 | 1,783 (18.1)    | 5,465 (18.2)  | 0.00 |
| <b>Medications (n,%)</b>      |                  |                 |               |      |                 |               |      |
| Low dose ASA                  | 30,562 (76.5)    | 7,294 (74.0)    | 23,268 (77.3) | 0.10 | 7,532 (76.4)    | 23,021 (76.5) | 0.00 |
| ADP inhibitors                | 3,263 (8.2)      | 700 (7.1)       | 2,563 (8.5)   | 0.08 | 812 (8.2)       | 2,460 (8.2)   | 0.00 |
| Anticoagulants                | 5,745 (14.4)     | 1,241 (12.6)    | 4,504 (15.0)  | 0.08 | 1,436 (14.6)    | 4,332 (14.4)  | 0.00 |
| Thiazides                     | 9,160 (22.9)     | 2,279 (23.1)    | 6,881 (22.9)  | 0.10 | 2,247 (22.8)    | 6,897 (22.9)  | 0.00 |
| Spironolactone                | 2,687 (6.7)      | 553 (5.6)       | 2,134 (7.1)   | 0.15 | 658 (6.7)       | 2,024 (6.7)   | 0.00 |
| Beta-blockers                 | 20,849 (52.2)    | 4,684 (47.5)    | 16,165 (53.7) | 0.10 | 5,128 (52.0)    | 15,701 (52.2) | 0.00 |
| ACE/ARB                       | 23,018 (57.6)    | 5,471 (55.5)    | 17,547 (58.3) | 0.08 | 5,687 (57.7)    | 17,341 (57.6) | 0.00 |
| CCBs                          | 14,505 (36.3)    | 3,454 (35.1)    | 11,051 (36.7) | 0.11 | 3,572 (36.2)    | 10,930 (36.3) | 0.00 |
| Antidepressants               | 7,958 (19.9)     | 2,001 (20.3)    | 5,957 (19.8)  | 0.14 | 1,954 (19.8)    | 5,992 (19.9)  | 0.00 |
| Antipsychotics                | 1,007 (2.5)      | 251 (2.5)       | 756 (2.5)     | 0.12 | 254 (2.6)       | 761 (2.5)     | 0.00 |

|                                  |               |              |               |      |              |               |      |
|----------------------------------|---------------|--------------|---------------|------|--------------|---------------|------|
| NSAIDs (non-selective)           | 4,697 (11.8)  | 1,220 (12.4) | 3,477 (11.6)  | 0.09 | 1,154 (11.7) | 3,538 (11.8)  | 0.00 |
| COX-2 inhibitors                 | 50 (0.1)      | 12 (0.1)     | 38 (0.1)      | 0.33 | 12 (0.1)     | 38 (0.1)      | 0.00 |
| <b>Cohabitation status (n,%)</b> |               |              |               |      |              |               |      |
| Alone                            | 19,571 (49.0) | 4,483 (45.5) | 15,088 (50.1) | .    | 4,836 (49.1) | 14,748 (49.0) | 0.00 |
| Cohabiting                       | 20,384 (51.0) | 5,370 (54.5) | 15,014 (49.9) | .    | 5,019 (50.9) | 15,355 (51.0) | 0.00 |

**Abbreviations:** ACE = angiotensin converting enzyme; ADP = adenosine diphosphate receptor; ARB = angiotensin receptor blocker; ASA = acetylsalicylic acid; COPD = chronic obstructive pulmonary disease; COX-2 = cyclooxygenase-2; IQR = interquartile range; NSAID = non-steroidal anti-inflammatory drugs; SMD = standardized mean difference

eTable 7. Summary of results with grace period of 90 days.

| Primary prevention   |                                    |                                        |                                     |                                        |                                     |                                                     |                                       |
|----------------------|------------------------------------|----------------------------------------|-------------------------------------|----------------------------------------|-------------------------------------|-----------------------------------------------------|---------------------------------------|
|                      | Discontinuation                    |                                        | Continuation                        |                                        | Rate difference                     |                                                     | Subhazard ratio (95% CI) <sup>b</sup> |
|                      | (11,245 person-years) <sup>a</sup> |                                        | (80,686 person-years) <sup>a</sup>  |                                        |                                     |                                                     |                                       |
| Outcome              | Crude events                       | Crude incidence rate per 1000 (95% CI) | Crude events                        | Crude incidence rate per 1000 (95% CI) | Crude rate difference per 1000 (CI) | Weighted rate difference per 1000 (CI) <sup>b</sup> |                                       |
| MACE                 | 357                                | 32 (29 to 35)                          | 1897                                | 24 (22 to 25)                          | 8.2 (4.8 to 11.7)                   | 8.8 (5.3 to 12.3)                                   | 1.25 (1.12 to 1.41)                   |
| MI                   | 102                                | 8.8 (7.3 to 10.7)                      | 507                                 | 6.1 (5.6 to 6.7)                       | 2.7 (0.9 to 4.5)                    | 3.0 (1.2 to 4.8)                                    | 1.42 (1.14 to 1.77)                   |
| Stroke               | 204                                | 18 (16 to 21)                          | 1064                                | 13 (12 to 14)                          | 5.0 (2.4 to 7.6)                    | 5.0 (2.4 to 7.6)                                    | 1.21 (1.04 to 1.41)                   |
| Revasc.              | 48                                 | 4.1 (3.1 to 5.5)                       | 375                                 | 4.5 (4.1 to 5.0)                       | -0.39 (-1.65 to 0.87)               | -0.02 (-1.31 to 1.28)                               | 0.96 (0.71 to 1.30)                   |
| Death                | 76                                 | 6.5 (5.2 to 8.2)                       | 315                                 | 3.8 (3.4 to 4.2)                       | 2.8 (1.2 to 4.3)                    | 2.8 (1.3 to 4.4)                                    | 1.62 (1.25 to 2.10)                   |
| Secondary prevention |                                    |                                        |                                     |                                        |                                     |                                                     |                                       |
|                      | Discontinuation                    |                                        | Continuation                        |                                        | Rate difference                     |                                                     | Subhazard ratio (95% CI) <sup>b</sup> |
|                      | (12,271 person-years) <sup>a</sup> |                                        | (106,010 person-years) <sup>a</sup> |                                        |                                     |                                                     |                                       |
| Outcome              | Crude events                       | Crude incidence rate per 1000 (95% CI) | Crude events                        | Crude incidence rate per 1000 (95% CI) | Crude rate difference per 1000 (CI) | Weighted rate difference per 1000 (CI) <sup>b</sup> |                                       |
| MACE                 | 761                                | 62 (58 to 67)                          | 5095                                | 48 (47 to 49)                          | 14 (9 to 19)                        | 16(11 to 20)                                        | 1.24 (1.15 to 1.35)                   |
| MI                   | 256                                | 20 (17 to 22)                          | 1820                                | 16 (16 to 17)                          | 3.4 (0.8 to 5.9)                    | 4.5(1.9 to 7.1)                                     | 1.21 (1.06 to 1.39)                   |
| Stroke               | 360                                | 28 (25 to 31)                          | 2299                                | 21 (20 to 22)                          | 7.3 (4.3 to 10.3)                   | 7.0(4.0 to 10.0)                                    | 1.20 (1.07 to 1.35)                   |
| Revasc.              | 80                                 | 6.1 (4.9 to 7.6)                       | 1125                                | 10 (10 to 11)                          | -4.0 (-5.5 to -2.6)                 | -3.4(-4.9 to -1.9)                                  | 0.66 (0.53 to 0.84)                   |
| Death                | 239                                | 18 (16 to 20)                          | 1074                                | 9.4 (8.9 to 10.0)                      | 8.4 (6.1 to 10.8)                   | 9.0(6.6 to 11.3)                                    | 1.76 (1.52 to 2.03)                   |

Abbreviations: CI = confidence interval; Death = death due to myocardial or ischemic stroke; MACE = major adverse cardiovascular events; MI = myocardial infarction; Revasc = revascularization procedure

<sup>a</sup> Person years of follow-up for MACE

<sup>b</sup> Adjusted estimates obtained in an inverse probability of treatment weighted (IPTW) pseudo-population using stabilized weights. Weights incorporated propensity scores calculated from baseline age, sex, number of concomitant medications, individual medications, co-morbidities, statin intensity, and co-habitation status.

**eTable 8. Summary of results with grace period of 30 days.**

| Primary prevention   |                                                      |                                        |                                                    |                                        |                                     |                                                     |                                       |
|----------------------|------------------------------------------------------|----------------------------------------|----------------------------------------------------|----------------------------------------|-------------------------------------|-----------------------------------------------------|---------------------------------------|
|                      | Discontinuation<br>(7,849 person-years) <sup>a</sup> |                                        | Continuation<br>(39,250 person-years) <sup>a</sup> |                                        | Rate difference                     |                                                     | Subhazard ratio (95% CI) <sup>b</sup> |
| Outcome              | Crude events                                         | Crude incidence rate per 1000 (95% CI) | Crude events                                       | Crude incidence rate per 1000 (95% CI) | Crude rate difference per 1000 (CI) | Weighted rate difference per 1000 (CI) <sup>b</sup> |                                       |
| <b>MACE</b>          | 245                                                  | 31 (28 to 35)                          | 883                                                | 22 (21 to 24)                          | 8.7 (4.5 to 12.9)                   | 9.4 (5.2 to 13.5)                                   | 1.24 (1.07 to 1.44)                   |
| <b>MI</b>            | 69                                                   | 8.6 (6.8 to 10.9)                      | 250                                                | 6.2 (5.5 to 7.1)                       | 2.4 (0.2 to 4.5)                    | 2.5 (0.4 to 4.7)                                    | 1.23 (0.93 to 1.63)                   |
| <b>Stroke</b>        | 135                                                  | 17 (14 to 20)                          | 460                                                | 12 (11 to 13)                          | 5.5 (2.4 to 8.5)                    | 5.6 (2.6 to 8.6)                                    | 1.28 (1.05 to 1.56)                   |
| <b>Revasc.</b>       | 36                                                   | 4.5 (3.2 to 6.2)                       | 197                                                | 4.9 (4.3 to 5.7)                       | -0.46 (-2.08 to 1.15)               | -0.61 (-2.22 to 0.99)                               | 0.77 (0.53 to 1.11)                   |
| <b>Death</b>         | 57                                                   | 7.1 (5.4 to 9.1)                       | 148                                                | 3.7 (3.1 to 4.3)                       | 3.4 (1.5 to 5.3)                    | 3.8 (1.9 to 5.8)                                    | 1.98 (1.44 to 2.72)                   |
| Secondary prevention |                                                      |                                        |                                                    |                                        |                                     |                                                     |                                       |
|                      | Discontinuation<br>(8,992 person-years) <sup>a</sup> |                                        | Continuation<br>(54,540 person-years) <sup>a</sup> |                                        | Rate difference                     |                                                     | Subhazard ratio (95% CI) <sup>b</sup> |
| Outcome              | Crude events                                         | Crude incidence rate per 1000 (95% CI) | Crude events                                       | Crude incidence rate per 1000 (95% CI) | Crude rate difference per 1000 (CI) | Weighted rate difference per 1000 (CI) <sup>b</sup> |                                       |
| <b>MACE</b>          | 568                                                  | 63 (58 to 69)                          | 2613                                               | 48 (46 to 50)                          | 15 (10 to 21)                       | 16(11 to 22)                                        | 1.18 (1.07 to 1.29)                   |
| <b>MI</b>            | 189                                                  | 20 (17 to 23)                          | 940                                                | 17 (16 to 18)                          | 3.4 (0.4 to 6.5)                    | 4.1(1.0 to 7.1)                                     | 1.10 (0.94 to 1.30)                   |
| <b>Stroke</b>        | 254                                                  | 27 (24 to 31)                          | 1103                                               | 20 (19 to 21)                          | 7.7 (4.1 to 11.2)                   | 7.1(3.6 to 10.6)                                    | 1.14 (0.99 to 1.31)                   |
| <b>Revasc.</b>       | 72                                                   | 7.6 (6.0 to 9.5)                       | 611                                                | 11 (10 to 12)                          | -3.3 (-5.2 to -1.3)                 | -3.9(-5.8 to -1.9)                                  | 0.64 (0.50 to 0.82)                   |
| <b>Death</b>         | 179                                                  | 19 (16 to 21)                          | 542                                                | 9.4 (8.7 to 10.3)                      | 9.1 (6.3 to 11.9)                   | 10(8 to 13)                                         | 1.83 (1.54 to 2.19)                   |

Abbreviations: CI = confidence interval; Death = death due to myocardial or ischemic stroke; MACE = major adverse cardiovascular events; MI = myocardial infarction; Revasc = revascularization procedure

<sup>a</sup> Person years of follow-up for MACE

<sup>b</sup> Adjusted estimates obtained in an inverse probability of treatment weighted (IPTW) pseudo-population using stabilized weights. Weights incorporated propensity scores calculated from baseline age, sex, number of concomitant medications, individual medications, co-morbidities, statin intensity, and co-habitation status.

**eTable 9. Summary of results with medication possession ratio threshold of  $\geq 80\%$ .**

| Primary prevention   |                                                       |                                        |                                                     |                                        |                                     |                                                     |                                       |
|----------------------|-------------------------------------------------------|----------------------------------------|-----------------------------------------------------|----------------------------------------|-------------------------------------|-----------------------------------------------------|---------------------------------------|
|                      | Discontinuation<br>(10,395 person-years) <sup>a</sup> |                                        | Continuation<br>(96,851 person-years) <sup>a</sup>  |                                        | Rate difference                     |                                                     | Subhazard ratio (95% CI) <sup>b</sup> |
| Outcome              | Crude events                                          | Crude incidence rate per 1000 (95% CI) | Crude events                                        | Crude incidence rate per 1000 (95% CI) | Crude rate difference per 1000 (CI) | Weighted rate difference per 1000 (CI) <sup>b</sup> |                                       |
| <b>MACE</b>          | 333                                                   | 32 (29 to 36)                          | 2330                                                | 24 (23 to 25)                          | 8.0 (4.4 to 11.6)                   | 8.0(4.3 to 11.6)                                    | 1.27 (1.13 to 1.44)                   |
| <b>MI</b>            | 86                                                    | 8.0 (6.5 to 9.9)                       | 646                                                 | 6.5 (6.0 to 7.0)                       | 1.6 (-0.2 to 3.3)                   | 1.9(0.1 to 3.8)                                     | 1.29 (1.02 to 1.63)                   |
| <b>Stroke</b>        | 201                                                   | 19 (17 to 22)                          | 1303                                                | 13 (13 to 14)                          | 5.9 (3.2 to 8.7)                    | 5.5(2.7 to 8.2)                                     | 1.29 (1.10 to 1.51)                   |
| <b>Revasc.</b>       | 37                                                    | 3.4 (2.5 to 4.7)                       | 456                                                 | 4.6 (4.2 to 5.0)                       | -1.1 (-2.3 to 0.0)                  | -0.24(-1.53 to 1.06)                                | 1.00 (0.71 to 1.41)                   |
| <b>Death</b>         | 70                                                    | 6.5 (5.1 to 8.2)                       | 406                                                 | 4.0 (3.6 to 4.4)                       | 2.5 (0.9 to 4.0)                    | 2.1(0.5 to 3.6)                                     | 1.45 (1.11 to 1.90)                   |
| Secondary prevention |                                                       |                                        |                                                     |                                        |                                     |                                                     |                                       |
|                      | Discontinuation<br>(11,206 person-years) <sup>a</sup> |                                        | Continuation<br>(126,948 person-years) <sup>a</sup> |                                        | Rate difference                     |                                                     | Subhazard ratio (95% CI) <sup>b</sup> |
| Outcome              | Crude events                                          | Crude incidence rate per 1000 (95% CI) | Crude events                                        | Crude incidence rate per 1000 (95% CI) | Crude rate difference per 1000 (CI) | Weighted rate difference per 1000 (CI) <sup>b</sup> |                                       |
| <b>MACE</b>          | 676                                                   | 60 (56 to 65)                          | 6180                                                | 49 (47 to 50)                          | 12 (7 to 16)                        | 13(8 to 18)                                         | 1.29 (1.18 to 1.40)                   |
| <b>MI</b>            | 225                                                   | 19 (17 to 22)                          | 2239                                                | 17 (16 to 17)                          | 2.2 (-0.4 to 4.7)                   | 3.5(0.8 to 6.2)                                     | 1.24 (1.07 to 1.43)                   |
| <b>Stroke</b>        | 357                                                   | 31 (28 to 34)                          | 2799                                                | 21 (20 to 22)                          | 9.4 (6.1 to 12.7)                   | 9.0(5.7 to 12.3)                                    | 1.39 (1.24 to 1.56)                   |
| <b>Revasc.</b>       | 63                                                    | 5.2 (4.1 to 6.6)                       | 1345                                                | 10 (9 to 11)                           | -4.8 (-6.2 to -3.4)                 | -3.7(-5.2 to -2.2)                                  | 0.69 (0.53 to 0.90)                   |
| <b>Death</b>         | 194                                                   | 16 (14 to 18)                          | 1332                                                | 9.7 (9.2 to 10.2)                      | 6.1 (3.8 to 8.3)                    | 6.2(3.9 to 8.6)                                     | 1.57 (1.34 to 1.84)                   |

Abbreviations: CI = confidence interval; Death = death due to myocardial or ischemic stroke; MACE = major adverse cardiovascular events; MI = myocardial infarction; Revasc = revascularization procedure

<sup>a</sup> Person years of follow-up for MACE

<sup>b</sup> Adjusted estimates obtained in an inverse probability of treatment weighted (IPTW) pseudo-population using stabilized weights. Weights incorporated propensity scores calculated from baseline age, sex, number of concomitant medications, individual medications, co-morbidities, statin intensity, and co-habitation status.

**eTable 10. Summary of results with medication possession ratio threshold of  $\geq 90\%$ .**

| Primary prevention   |                                                      |                                        |                                                     |                                        |                                     |                                                     |                                       |
|----------------------|------------------------------------------------------|----------------------------------------|-----------------------------------------------------|----------------------------------------|-------------------------------------|-----------------------------------------------------|---------------------------------------|
|                      | Discontinuation<br>(7,717 person-years) <sup>a</sup> |                                        | Continuation<br>(78,729 person-years) <sup>a</sup>  |                                        | Rate difference                     |                                                     | Subhazard ratio (95% CI) <sup>b</sup> |
| Outcome              | Crude events                                         | Crude incidence rate per 1000 (95% CI) | Crude events                                        | Crude incidence rate per 1000 (95% CI) | Crude rate difference per 1000 (CI) | Weighted rate difference per 1000 (CI) <sup>b</sup> |                                       |
| <b>MACE</b>          | 236                                                  | 31 (27 to 35)                          | 1876                                                | 24 (23 to 25)                          | 6.8 (2.7 to 10.8)                   | 7.1(2.9 to 11.2)                                    | 1.21 (1.04 to 1.39)                   |
| <b>MI</b>            | 65                                                   | 8.2 (6.4 to 10.4)                      | 522                                                 | 6.4 (5.9 to 7.0)                       | 1.8 (-0.3 to 3.8)                   | 2.3(0.1 to 4.5)                                     | 1.33 (1.02 to 1.75)                   |
| <b>Stroke</b>        | 134                                                  | 17 (15 to 20)                          | 1036                                                | 13 (12 to 14)                          | 4.3 (1.2 to 7.3)                    | 4.1(1.0 to 7.1)                                     | 1.16 (0.96 to 1.41)                   |
| <b>Revasc.</b>       | 27                                                   | 3.4 (2.3 to 4.9)                       | 368                                                 | 4.5 (4.1 to 5.0)                       | -1.2 (-2.5 to 0.2)                  | -0.13(-1.65 to 1.39)                                | 1.01 (0.67 to 1.52)                   |
| <b>Death</b>         | 56                                                   | 7.0 (5.4 to 9.1)                       | 337                                                 | 4.1 (3.7 to 4.6)                       | 2.9 (1.0 to 4.8)                    | 2.4(0.6 to 4.3)                                     | 1.49 (1.11 to 2.01)                   |
| Secondary prevention |                                                      |                                        |                                                     |                                        |                                     |                                                     |                                       |
|                      | Discontinuation<br>(9,026 person-years) <sup>a</sup> |                                        | Continuation<br>(108,303 person years) <sup>a</sup> |                                        | Rate difference                     |                                                     | Subhazard ratio (95% CI) <sup>b</sup> |
| Outcome              | Crude events                                         | Crude incidence rate per 1000 (95% CI) | Crude events                                        | Crude incidence rate per 1000 (95% CI) | Crude rate difference per 1000 (CI) | Weighted rate difference per 1000 (CI) <sup>b</sup> |                                       |
| <b>MACE</b>          | 528                                                  | 59 (54 to 64)                          | 5233                                                | 48 (47 to 50)                          | 10 (5 to 15)                        | 12(6 to 17)                                         | 1.26 (1.15 to 1.39)                   |
| <b>MI</b>            | 172                                                  | 18 (15 to 21)                          | 1887                                                | 17 (16 to 17)                          | 1.4 (-1.4 to 4.2)                   | 2.9(-0.0 to 5.9)                                    | 1.21 (1.03 to 1.43)                   |
| <b>Stroke</b>        | 278                                                  | 30 (26 to 33)                          | 2366                                                | 21 (20 to 22)                          | 8.6 (5.0 to 12.2)                   | 8.3(4.7 to 12.0)                                    | 1.37 (1.20 to 1.56)                   |
| <b>Revasc.</b>       | 42                                                   | 4.3 (3.2 to 5.8)                       | 1148                                                | 10 (9 to 11)                           | -5.7 (-7.2 to -4.3)                 | -4.6(-6.1 to -3.0)                                  | 0.60 (0.43 to 0.82)                   |
| <b>Death</b>         | 158                                                  | 16 (14 to 19)                          | 1133                                                | 9.7 (9.1 to 10.2)                      | 6.3 (3.7 to 8.8)                    | 6.3(3.7 to 8.9)                                     | 1.59 (1.33 to 1.89)                   |

Abbreviations: CI = confidence interval; Death = death due to myocardial or ischemic stroke; MACE = major adverse cardiovascular events; MI = myocardial infarction; Revasc = revascularization procedure

<sup>a</sup> Person years of follow-up for MACE

<sup>b</sup> Adjusted estimates obtained in an inverse probability of treatment weighted (IPTW) pseudo-population using stabilized weights. Weights incorporated propensity scores calculated from baseline age, sex, number of concomitant medications, individual medications, co-morbidities, statin intensity, and co-habitation status.



**eTable 11. Summary of results with no medication possession ratio threshold.**

| Primary prevention   |                                                       |                                        |                                                                  |                                        |                                     |                                                     |                                       |
|----------------------|-------------------------------------------------------|----------------------------------------|------------------------------------------------------------------|----------------------------------------|-------------------------------------|-----------------------------------------------------|---------------------------------------|
|                      | Discontinuation<br>(12,883 person-years) <sup>a</sup> |                                        | Continuation <sup>a</sup><br>(107,866 person years) <sup>a</sup> |                                        | Rate difference                     |                                                     | Subhazard ratio (95% CI) <sup>b</sup> |
| Outcome              | Crude events                                          | Crude incidence rate per 1000 (95% CI) | Crude events                                                     | Crude incidence rate per 1000 (95% CI) | Crude rate difference per 1000 (CI) | Weighted rate difference per 1000 (CI) <sup>b</sup> |                                       |
| <b>MACE</b>          | 419                                                   | 33 (30 to 36)                          | 2564                                                             | 24 (23 to 25)                          | 8.8 (5.5 to 12.0)                   | 9.2(5.9 to 12.5)                                    | 1.34 (1.20 to 1.49)                   |
| <b>MI</b>            | 113                                                   | 8.5 (7.1 to 10.3)                      | 714                                                              | 6.4 (6.0 to 6.9)                       | 2.1 (0.5 to 3.8)                    | 2.7(1.0 to 4.4)                                     | 1.40 (1.14 to 1.72)                   |
| <b>Stroke</b>        | 247                                                   | 19 (17 to 22)                          | 1440                                                             | 13 (12 to 14)                          | 5.9 (3.4 to 8.3)                    | 5.4(2.9 to 7.9)                                     | 1.31 (1.14 to 1.51)                   |
| <b>Revasc.</b>       | 54                                                    | 4.1 (3.1 to 5.3)                       | 495                                                              | 4.5 (4.1 to 4.9)                       | -0.40 (-1.55 to 0.75)               | 0.51(-0.74 to 1.76)                                 | 1.17 (0.88 to 1.56)                   |
| <b>Death</b>         | 80                                                    | 6.0 (4.8 to 7.5)                       | 445                                                              | 4.0 (3.6 to 4.3)                       | 2.0 (0.7 to 3.4)                    | 2.0(0.6 to 3.3)                                     | 1.43 (1.11 to 1.83)                   |
| Secondary prevention |                                                       |                                        |                                                                  |                                        |                                     |                                                     |                                       |
|                      | Discontinuation<br>(13,263 person-years) <sup>a</sup> |                                        | Continuation<br>(137,508 person-years) <sup>a</sup>              |                                        | Rate difference                     |                                                     | Subhazard ratio (95% CI) <sup>b</sup> |
| Outcome              | Crude events                                          | Crude incidence rate per 1000 (95% CI) | Crude events                                                     | Crude incidence rate per 1000 (95% CI) | Crude rate difference per 1000 (CI) | Weighted rate difference per 1000 (CI) <sup>b</sup> |                                       |
| <b>MACE</b>          | 801                                                   | 60 (56 to 65)                          | 6678                                                             | 49 (47 to 50)                          | 12 (7 to 16)                        | 13(9 to 18)                                         | 1.29 (1.19 to 1.40)                   |
| <b>MI</b>            | 263                                                   | 19 (17 to 21)                          | 2405                                                             | 17 (16 to 17)                          | 2.1 (-0.2 to 4.5)                   | 3.5(1.0 to 5.9)                                     | 1.23 (1.08 to 1.41)                   |
| <b>Stroke</b>        | 420                                                   | 30 (28 to 34)                          | 3044                                                             | 21 (21 to 22)                          | 9.2 (6.2 to 12.2)                   | 8.6(5.5 to 11.6)                                    | 1.37 (1.23 to 1.53)                   |
| <b>Revasc.</b>       | 81                                                    | 5.7 (4.6 to 7.0)                       | 1463                                                             | 10 (10 to 11)                          | -4.4 (-5.7 to -3.1)                 | -3.4(-4.8 to -2.0)                                  | 0.73 (0.58 to 0.92)                   |
| <b>Death</b>         | 222                                                   | 15 (13 to 17)                          | 1425                                                             | 9.6 (9.1 to 10.1)                      | 5.7 (3.7 to 7.8)                    | 6.0(3.9 to 8.1)                                     | 1.56 (1.34 to 1.80)                   |

Abbreviations: CI = confidence interval; Death = death due to myocardial or ischemic stroke; MACE = major adverse cardiovascular events; MI = myocardial infarction; Revasc = revascularization procedure

<sup>a</sup> Person years of follow-up for MACE

<sup>b</sup> Adjusted estimates obtained in an inverse probability of treatment weighted (IPTW) pseudo-population using stabilized weights. Weights incorporated propensity scores calculated from baseline age, sex, number of concomitant medications, individual medications, co-morbidities, statin intensity, and co-habitation status.

**eTable 12. Summary of results using high dimensional propensity score in inverse probability of treatment weighting procedure.**

| Primary prevention   |                                                       |                                        |                                                     |                                        |                                     |                                                     |                                       |
|----------------------|-------------------------------------------------------|----------------------------------------|-----------------------------------------------------|----------------------------------------|-------------------------------------|-----------------------------------------------------|---------------------------------------|
|                      | Discontinuation<br>(11,709 person-years) <sup>a</sup> |                                        | Continuation<br>(103,664 person years) <sup>a</sup> |                                        | Rate difference                     |                                                     | Subhazard ratio (95% CI) <sup>b</sup> |
| Outcome              | Crude events                                          | Crude incidence rate per 1000 (95% CI) | Crude events                                        | Crude incidence rate per 1000 (95% CI) | Crude rate difference per 1000 (CI) | Weighted rate difference per 1000 (CI) <sup>b</sup> |                                       |
| <b>MACE</b>          | 382                                                   | 33 (30 to 36)                          | 2481                                                | 24 (23 to 25)                          | 8.7 (5.3 to 12.1)                   | 9.1(5.7 to 12.6)                                    | 1.32 (1.17 to 1.49)                   |
| <b>MI</b>            | 102                                                   | 8.5 (7.0 to 10.3)                      | 692                                                 | 6.5 (6.0 to 7.0)                       | 2.0 (0.3 to 3.7)                    | 2.8(1.0 to 4.6)                                     | 1.42 (1.12 to 1.79)                   |
| <b>Stroke</b>        | 229                                                   | 19 (17 to 22)                          | 1390                                                | 13 (13 to 14)                          | 6.2 (3.6 to 8.8)                    | 5.4(2.8 to 8.0)                                     | 1.29 (1.11 to 1.50)                   |
| <b>Revasc.</b>       | 47                                                    | 3.9 (2.9 to 5.2)                       | 477                                                 | 4.5 (4.1 to 4.9)                       | -0.59 (-1.77 to 0.59)               | 0.45(-0.85 to 1.75)                                 | 1.15 (0.82 to 1.60)                   |
| <b>Death</b>         | 76                                                    | 6.3 (5.0 to 7.8)                       | 433                                                 | 4.0 (3.6 to 4.4)                       | 2.2 (0.8 to 3.7)                    | 2.3(0.8 to 3.7)                                     | 1.47 (1.13 to 1.91)                   |
| Secondary prevention |                                                       |                                        |                                                     |                                        |                                     |                                                     |                                       |
|                      | Discontinuation<br>(12,350 person-years) <sup>a</sup> |                                        | Continuation<br>(133,374 person-years) <sup>a</sup> |                                        | Rate difference                     |                                                     | Subhazard ratio (95% CI) <sup>b</sup> |
| Outcome              | Crude events                                          | Crude incidence rate per 1000 (95% CI) | Crude events                                        | Crude incidence rate per 1000 (95% CI) | Crude rate difference per 1000 (CI) | Weighted rate difference per 1000 (CI) <sup>b</sup> |                                       |
| <b>MACE</b>          | 739                                                   | 60 (56 to 64)                          | 6472                                                | 49 (47 to 50)                          | 11 (7 to 16)                        | 14(9 to 18)                                         | 1.27 (1.17 to 1.38)                   |
| <b>MI</b>            | 248                                                   | 19 (17 to 21)                          | 2326                                                | 17 (16 to 17)                          | 2.4 (-0.1 to 4.8)                   | 3.7(1.2 to 6.3)                                     | 1.22 (1.06 to 1.41)                   |
| <b>Stroke</b>        | 382                                                   | 30 (27 to 33)                          | 2953                                                | 21 (21 to 22)                          | 8.4 (5.4 to 11.5)                   | 8.2(5.0 to 11.3)                                    | 1.31 (1.17 to 1.47)                   |
| <b>Revasc.</b>       | 74                                                    | 5.5 (4.4 to 7.0)                       | 1416                                                | 10 (10 to 11)                          | -4.5 (-5.9 to -3.1)                 | -3.8(-5.2 to -2.4)                                  | 0.66 (0.52 to 0.85)                   |
| <b>Death</b>         | 211                                                   | 16 (14 to 18)                          | 1387                                                | 9.6 (9.1 to 10.1)                      | 6.0 (3.8 to 8.2)                    | 7.2(4.9 to 9.4)                                     | 1.64 (1.40 to 1.92)                   |

Abbreviations: CI = confidence interval; Death = death due to myocardial or ischemic stroke; MACE = major adverse cardiovascular events; MI = myocardial infarction; Revasc = revascularization procedure

<sup>a</sup> Person years of follow-up for MACE

<sup>b</sup> Adjusted estimates obtained in an inverse probability of treatment weighted (IPTW) pseudo-population using stabilized weights. Weights incorporated high dimensional propensity scores calculated from baseline age, sex, statin intensity, co-habitation status, and most common diagnoses and medications.

**eTable 13. Revascularization outcome broken down by PCI and CABG.**

| Primary prevention   |                                                       |                                        |                                                     |                                        |                                     |                                                     |                                       |
|----------------------|-------------------------------------------------------|----------------------------------------|-----------------------------------------------------|----------------------------------------|-------------------------------------|-----------------------------------------------------|---------------------------------------|
|                      | Discontinuation<br>(12,126 person years) <sup>a</sup> |                                        | Continuation<br>(106,834 person years) <sup>a</sup> |                                        | Rate difference                     |                                                     | Subhazard ratio (95% CI) <sup>b</sup> |
| Outcome              | Crude events                                          | Crude incidence rate per 1000 (95% CI) | Crude events                                        | Crude incidence rate per 1000 (95% CI) | Crude rate difference per 1000 (CI) | Weighted rate difference per 1000 (CI) <sup>b</sup> |                                       |
| Revasc.              | 47                                                    | 3.9 (2.9 to 5.2)                       | 477                                                 | 4.5 (4.1 to 4.9)                       | -0.59 (-1.77 to 0.59)               | 0.32 (-0.97 to 1.60)                                | 1.12 (0.82 to 1.52)                   |
| PCI                  | 41                                                    | 3.4 (2.5 to 4.6)                       | 345                                                 | 3.2 (2.9 to 3.6)                       | 0.15 (-0.94 to 1.24)                | 0.81 (-0.37 to 1.99)                                | 1.25 (0.90 to 1.75)                   |
| CABG                 | 6                                                     | 0.49 (0.22 to 1.10)                    | 133                                                 | 1.1 (1.1 to 1.5)                       | -0.75 (-1.20 to -0.30)              | -0.50(-1.01 to 0.01)                                | 0.68 (0.30 to 1.55)                   |
| Secondary prevention |                                                       |                                        |                                                     |                                        |                                     |                                                     |                                       |
|                      | Discontinuation<br>(13,336 person years) <sup>a</sup> |                                        | Continuation<br>(140,970 person years) <sup>a</sup> |                                        | Rate difference                     |                                                     | Subhazard ratio (95% CI) <sup>b</sup> |
| Outcome              | Crude events                                          | Crude incidence rate per 1000 (95% CI) | Crude events                                        | Crude incidence rate per 1000 (95% CI) | Crude rate difference per 1000 (CI) | Weighted rate difference per 1000 (CI) <sup>b</sup> |                                       |
| Revasc.              | 74                                                    | 5.5 (4.4 to 7.0)                       | 1416                                                | 10 (10 to 11)                          | -4.5 (-5.9 to -3.1)                 | -3.4 (-4.8 to -1.9)                                 | 0.73 (0.57 to 0.93)                   |
| PCI                  | 69                                                    | 5.2 (4.1 to 6.6)                       | 1206                                                | 8.6 (8.1 to 9.1)                       | -3.4 (-4.7 to -2.1)                 | -2.2(-3.7 to -0.9)                                  | 0.79 (0.61 to 1.01)                   |
| CABG                 | 5                                                     | 0.37 (0.16 to 0.90)                    | 214                                                 | 1.5 (1.3 to 1.7)                       | -1.1 (-1.5 to -0.8)                 | -1.1(-1.5 to -0.7)                                  | 0.32 (0.13 to 0.77)                   |

Abbreviations: CABG = coronary artery bypass graft; CI = confidence interval; PCI = percutaneous coronary intervention; Revasc = revascularization procedure

<sup>a</sup> Person years of follow-up for revascularizations

<sup>b</sup> Adjusted estimates obtained in an inverse probability of treatment weighted (IPTW) pseudo-population using stabilized weights. Weights incorporated propensity scores calculated from baseline age, sex, number of concomitant medications, individual medications, co-morbidities, statin intensity, and co-habitation status. The grace period (180 days) and medication possession ratio cutoff (70%) were the same as for the main analysis.

**eTable 14. General Practitioner (GP) contacts<sup>a</sup> each year of follow-up.**

| Year                 | Incidence of GP contacts per 1000 persons |              |
|----------------------|-------------------------------------------|--------------|
|                      | Discontinuation                           | Continuation |
| Primary prevention   |                                           |              |
| 2011 <sup>b</sup>    | 2912                                      | 6414         |
| 2012                 | 6380                                      | 11750        |
| 2013                 | 7953                                      | 11593        |
| 2014                 | 9471                                      | 11594        |
| 2015                 | 10138                                     | 11754        |
| 2016                 | 10084                                     | 11560        |
| Secondary prevention |                                           |              |
| 2011 <sup>b</sup>    | 3411                                      | 7242         |
| 2012                 | 7144                                      | 13123        |
| 2013                 | 8833                                      | 12892        |
| 2014                 | 10296                                     | 12991        |
| 2015                 | 11010                                     | 12999        |
| 2016                 | 11073                                     | 12665        |

<sup>a</sup> Included any GP contact (e.g. in-person visit, home visit, telephone consultation, email)

<sup>b</sup> Follow up started June 30, 2011

**eTable 15. Crude incidence of mortality for causes other than MI and ischemic stroke.**

| Year of follow-up | Incidence of mortality per 1000 |              |
|-------------------|---------------------------------|--------------|
|                   | Discontinuation                 | Continuation |
| Primary           |                                 |              |
| 1                 | 130 (105-161)                   | 42 (39-44)   |
| 2                 | 147 (129-167)                   | 49 (46-52)   |
| 3                 | 113 (100-128)                   | 46 (43-49)   |
| 4                 | 125 (112-139)                   | 53 (50-57)   |
| 5                 | 148 (135-163)                   | 57 (54-61)   |
| >5                | 176 (157-198)                   | 60 (54-67)   |
| <b>Overall</b>    | 139 (132-145)                   | 49 (48-50)   |
| Secondary         |                                 |              |
| 1                 | 209 (179-243)                   | 42 (39-44)   |
| 2                 | 211 (191-233)                   | 49 (46-52)   |
| 3                 | 192 (176-210)                   | 46 (43-49)   |
| 4                 | 209 (193-227)                   | 53 (50-57)   |
| 5                 | 231 (214-249)                   | 57 (54-61)   |
| >5                | 247 (223-274)                   | 60 (54-67)   |
| <b>Overall</b>    | 216 (208-224)                   | 49 (48-50)   |

**eTable 16. Other cardiovascular medication use approaching statin discontinuation date<sup>a</sup> in statin discontinuation group.**

| Medication | 180 day period before discontinuation date | 181 to 360 day period before discontinuation | Baseline   |
|------------|--------------------------------------------|----------------------------------------------|------------|
| Primary    |                                            |                                              |            |
| ASA        | 2651 (32%)                                 | 3213 (39%)                                   | 3549 (43%) |
| Thiazides  | 1631 (20%)                                 | 1940 (23%)                                   | 2314 (28%) |
| ACE/ARB    | 3954 (48%)                                 | 4531 (55%)                                   | 4651 (56%) |
| Secondary  |                                            |                                              |            |
| ASA        | 5314 (54%)                                 | 6398 (65%)                                   | 7294 (74%) |
| Thiazides  | 1562 (16%)                                 | 1920 (19%)                                   | 2279 (23%) |
| ACE/ARB    | 4397 (45%)                                 | 5174 (53%)                                   | 5471 (56%) |

Abbreviations: ACE/ARB = angiotensin converting enzyme inhibitor or angiotensin receptor blocker; ASA = aspirin

<sup>a</sup> end of grace period

**eTable 17. Crude incidence of MACE each year of follow-up.**

| Year of follow-up | Incidence of MACE per 1000 persons |              |
|-------------------|------------------------------------|--------------|
|                   | Discontinuation                    | Continuation |
| Primary           |                                    |              |
| 1                 | 36 (24-54)                         | 24 (22-26)   |
| 2                 | 33 (25-43)                         | 22 (20-24)   |
| 3                 | 37 (30-46)                         | 25 (22-27)   |
| 4                 | 32 (26-39)                         | 25 (22-27)   |
| 5                 | 31 (25-38)                         | 26 (23-29)   |
| >5                | 29 (22-39)                         | 21 (18-25)   |
| Secondary         |                                    |              |
| 1                 | 75 (58-97)                         | 53 (51-55)   |
| 2                 | 60 (50-72)                         | 51 (49-54)   |
| 3                 | 62 (53-73)                         | 45 (43-48)   |
| 4                 | 59 (50-68)                         | 48 (45-51)   |
| 5                 | 57 (49-66)                         | 43 (40-47)   |
| >5                | 56 (45-69)                         | 39 (35-44)   |

**eTable 18. Summary of results for all-cause and non-cardiovascular mortality .**

| Primary prevention   |                                                       |                                        |                                                     |                                        |                                     |                                                     |                                          |
|----------------------|-------------------------------------------------------|----------------------------------------|-----------------------------------------------------|----------------------------------------|-------------------------------------|-----------------------------------------------------|------------------------------------------|
|                      | Discontinuation<br>(12,239 person years) <sup>a</sup> |                                        | Continuation<br>(108,930 person years) <sup>a</sup> |                                        | Rate difference                     |                                                     | Subhazard ratio (95%<br>CI) <sup>b</sup> |
| Outcome              | Crude events                                          | Crude incidence rate per 1000 (95% CI) | Crude events                                        | Crude incidence rate per 1000 (95% CI) | Crude rate difference per 1000 (CI) | Weighted rate difference per 1000 (CI) <sup>b</sup> |                                          |
| All-cause            | 1873                                                  | 153 (146 to 160)                       | 6158                                                | 57 (55 to 58)                          | 97 (89 to 104)                      | 89 (82 to 96)                                       | 2.35 (2.22 to 2.49)                      |
| Non-CV               | 1775                                                  | 146 (139 to 153)                       | 5642                                                | 52 (51 to 54)                          | 94 (87 to 101)                      | 87(80 to 93)                                        | 2.42 (2.28 to 2.56)                      |
| Secondary prevention |                                                       |                                        |                                                     |                                        |                                     |                                                     |                                          |
|                      | Discontinuation<br>(13,768 person years) <sup>a</sup> |                                        | Continuation<br>(147,668 person years) <sup>a</sup> |                                        | Rate difference                     |                                                     | Subhazard ratio (95%<br>CI) <sup>b</sup> |
| Outcome              | Crude events                                          | Crude incidence rate per 1000 (95% CI) | Crude events                                        | Crude incidence rate per 1000 (95% CI) | Crude rate difference per 1000 (CI) | Weighted rate difference per 1000 (CI) <sup>b</sup> |                                          |
| All-cause            | 3369                                                  | 245 (237 to 253)                       | 14527                                               | 98 (97 to 100)                         | 146 (138 to 155)                    | 140(131 to 148)                                     | 2.29 (2.20 to 2.39)                      |
| Non-CV               | 3073                                                  | 227 (219 to 235)                       | 12664                                               | 88 (86 to 89)                          | 139 (131 to 148)                    | 133(124 to 141)                                     | 2.38 (2.28 to 2.48)                      |

Abbreviations: CI = confidence interval; CV = cardiovascular

<sup>a</sup> Person years of follow-up for all-cause mortality

<sup>b</sup> Adjusted estimates obtained in an inverse probability of treatment weighted (IPTW) pseudo-population using stabilized weights. Weights incorporated propensity scores calculated from baseline age, sex, number of concomitant medications, individual medications, co-morbidities, statin intensity, and co-habitation status. The grace period (180 days) and medication possession ratio cutoff (70%) were the same as for the main analysis.



**eTable 19. Summary of results for negative control outcome (hip fracture).**

| Primary prevention     |                                                       |                                        |                                                     |                                        |                                     |                                                     |                                       |
|------------------------|-------------------------------------------------------|----------------------------------------|-----------------------------------------------------|----------------------------------------|-------------------------------------|-----------------------------------------------------|---------------------------------------|
|                        | Discontinuation<br>(10,884 person years) <sup>a</sup> |                                        | Continuation<br>(102,406 person years) <sup>a</sup> |                                        | Rate difference                     |                                                     | Subhazard ratio (95% CI) <sup>b</sup> |
| Outcome                | Crude events                                          | Crude incidence rate per 1000 (95% CI) | Crude events                                        | Crude incidence rate per 1000 (95% CI) | Crude rate difference per 1000 (CI) | Weighted rate difference per 1000 (CI) <sup>b</sup> |                                       |
| Hip fract <sup>c</sup> | 225                                                   | 21 (18 to 24)                          | 1169                                                | 11 (11 to 12)                          | 9.3 (6.5 to 12.0)                   | 7.6(4.8 to 10.3)                                    | 1.51 (1.30 to 1.75)                   |
| Secondary prevention   |                                                       |                                        |                                                     |                                        |                                     |                                                     |                                       |
|                        | Discontinuation<br>(12,011 person years) <sup>a</sup> |                                        | Continuation<br>(137,361 person years) <sup>a</sup> |                                        | Rate difference                     |                                                     | Subhazard ratio (95% CI) <sup>b</sup> |
| Outcome                | Crude events                                          | Crude incidence rate per 1000 (95% CI) | Crude events                                        | Crude incidence rate per 1000 (95% CI) | Crude rate difference per 1000 (CI) | Weighted rate difference per 1000 (CI) <sup>b</sup> |                                       |
| Hip fract <sup>c</sup> | 308                                                   | 26 (23 to 29)                          | 2017                                                | 15 (14 to 15)                          | 11 (8 to 14)                        | 8.5(5.6 to 11.4)                                    | 1.45 (1.28 to 1.64)                   |

Abbreviations: fract = fracture

<sup>a</sup> Person years of follow-up for hip fracture

<sup>b</sup> Adjusted estimates obtained in an inverse probability of treatment weighted (IPTW) pseudo-population using stabilized weights. Weights incorporated propensity scores calculated from baseline age, sex, number of concomitant medications, individual medications, co-morbidities, statin intensity, and co-habitation status. The grace period (180 days) and medication possession ratio cutoff (70%) were the same as for the main analysis.

<sup>c</sup> Hip fracture was determined using the following ICD-10 codes: DS720, DS721, DS722 (Hjeholt et al. Clinical Epidemiology 2020;12:123–131)

**eTable 20. Summary of results sex-stratified MACE analysis.**

| Primary prevention   |                                 |                                        |                                   |                                        |                                     |                                                     |                                       |
|----------------------|---------------------------------|----------------------------------------|-----------------------------------|----------------------------------------|-------------------------------------|-----------------------------------------------------|---------------------------------------|
|                      | Discontinuation                 |                                        | Continuation                      |                                        | Rate difference                     |                                                     | Subhazard ratio (95% CI) <sup>b</sup> |
|                      | (3,048-m; 8,661-f) <sup>a</sup> |                                        | (34,470-m; 68,925-f) <sup>a</sup> |                                        |                                     |                                                     |                                       |
| Outcome              | Crude events                    | Crude incidence rate per 1000 (95% CI) | Crude events                      | Crude incidence rate per 1000 (95% CI) | Crude rate difference per 1000 (CI) | Weighted rate difference per 1000 (CI) <sup>b</sup> |                                       |
| MACE-m               | 127                             | 42 (35 to 50)                          | 1041                              | 30 (28 to 32)                          | 12 (4 to 19)                        | 12(5 to 19)                                         | 1.34 (1.10 to 1.63)                   |
| MACE-f               | 255                             | 29 (26 to 33)                          | 1440                              | 21 (20 to 22)                          | 8.5 (4.8 to 12.3)                   | 7.7(3.8 to 11.6)                                    | 1.32 (1.15 to 1.52)                   |
| Secondary prevention |                                 |                                        |                                   |                                        |                                     |                                                     |                                       |
|                      | Discontinuation                 |                                        | Continuation                      |                                        | Rate difference                     |                                                     | Subhazard ratio (95% CI) <sup>b</sup> |
|                      | (5,197-m; 7,153-f) <sup>a</sup> |                                        | (70,192-m; 63,182-f) <sup>a</sup> |                                        |                                     |                                                     |                                       |
| Outcome              | Crude events                    | Crude incidence rate per 1000 (95% CI) | Crude events                      | Crude incidence rate per 1000 (95% CI) | Crude rate difference per 1000 (CI) | Weighted rate difference per 1000 (CI) <sup>b</sup> |                                       |
| MACE-m               | 327                             | 63 (56 to 70)                          | 3734                              | 53 (52 to 55)                          | 9.7 (2.7 to 16.8)                   | 12(6 to 19)                                         | 1.21 (1.08 to 1.36)                   |
| MACE-f               | 412                             | 58 (52 to 63)                          | 2738                              | 43 (42 to 45)                          | 14 (8 to 20)                        | 14(7 to 20)                                         | 1.36 (1.22 to 1.52)                   |

Abbreviations: f = female; m = male; MACE-m = major adverse cardiovascular events in males to MACE-w = major adverse cardiovascular events in females

<sup>a</sup> Person years of follow-up for MACE

<sup>b</sup> Adjusted estimates obtained in an inverse probability of treatment weighted (IPTW) pseudo-population using stabilized weights. Weights incorporated propensity scores calculated from baseline age, number of concomitant medications, individual medications, co-morbidities, statin intensity, and co-habitation status. The grace period (180 days) and medication possession ratio cutoff (70%) were the same as for the main analysis.

## STROBE Statement—Checklist of items that should be included in reports of cohort studies

|                           | Item No | Recommendation                                                                                                                                                                       | Page No             |
|---------------------------|---------|--------------------------------------------------------------------------------------------------------------------------------------------------------------------------------------|---------------------|
| <b>Title and abstract</b> | 1       | (a) Indicate the study's design with a commonly used term in the title or the abstract                                                                                               |                     |
|                           |         | (b) Provide in the abstract an informative and balanced summary of what was done and what was found                                                                                  | 3                   |
| <b>Introduction</b>       |         |                                                                                                                                                                                      |                     |
| Background/rationale      | 2       | Explain the scientific background and rationale for the investigation being reported                                                                                                 | 4                   |
| Objectives                | 3       | State specific objectives, including any prespecified hypotheses                                                                                                                     | 4                   |
| <b>Methods</b>            |         |                                                                                                                                                                                      |                     |
| Study design              | 4       | Present key elements of study design early in the paper                                                                                                                              | 5                   |
| Setting                   | 5       | Describe the setting, locations, and relevant dates, including periods of recruitment, exposure, follow-up, and data collection                                                      | 5,6                 |
| Participants              | 6       | (a) Give the eligibility criteria, and the sources and methods of selection of participants. Describe methods of follow-up                                                           | 5,6                 |
|                           |         | (b) For matched studies, give matching criteria and number of exposed and unexposed                                                                                                  |                     |
| Variables                 | 7       | Clearly define all outcomes, exposures, predictors, potential confounders, and effect modifiers. Give diagnostic criteria, if applicable                                             | 6, supp material    |
| Data sources/measurement  | 8*      | For each variable of interest, give sources of data and details of methods of assessment (measurement). Describe comparability of assessment methods if there is more than one group | 5, 6, supp material |
| Bias                      | 9       | Describe any efforts to address potential sources of bias                                                                                                                            | 7                   |
| Study size                | 10      | Explain how the study size was arrived at                                                                                                                                            | 5                   |
| Quantitative variables    | 11      | Explain how quantitative variables were handled in the analyses. If applicable, describe which groupings were chosen and why                                                         | 7                   |
| Statistical methods       | 12      | (a) Describe all statistical methods, including those used to control for confounding                                                                                                | 7                   |
|                           |         | (b) Describe any methods used to examine subgroups and interactions                                                                                                                  |                     |
|                           |         | (c) Explain how missing data were addressed                                                                                                                                          |                     |
|                           |         | (d) If applicable, explain how loss to follow-up was addressed                                                                                                                       |                     |
|                           |         | (e) Describe any sensitivity analyses                                                                                                                                                |                     |
| <b>Results</b>            |         |                                                                                                                                                                                      |                     |

|                  |     |                                                                                                                                                                                                   |                  |
|------------------|-----|---------------------------------------------------------------------------------------------------------------------------------------------------------------------------------------------------|------------------|
| Participants     | 13* | (a) Report numbers of individuals at each stage of study—eg numbers potentially eligible, examined for eligibility, confirmed eligible, included in the study, completing follow-up, and analysed | 9                |
|                  |     | (b) Give reasons for non-participation at each stage                                                                                                                                              |                  |
|                  |     | (c) Consider use of a flow diagram                                                                                                                                                                |                  |
| Descriptive data | 14* | (a) Give characteristics of study participants (eg demographic, clinical, social) and information on exposures and potential confounders                                                          | 9, Table 1 and 2 |
|                  |     | (b) Indicate number of participants with missing data for each variable of interest                                                                                                               |                  |
|                  |     | (c) Summarise follow-up time (eg, average and total amount)                                                                                                                                       |                  |
| Outcome data     | 15* | Report numbers of outcome events or summary measures over time                                                                                                                                    | 9, 10            |

|                          |    |                                                                                                                                                                                                              |       |
|--------------------------|----|--------------------------------------------------------------------------------------------------------------------------------------------------------------------------------------------------------------|-------|
| Main results             | 16 | (a) Give unadjusted estimates and, if applicable, confounder-adjusted estimates and their precision (eg, 95% confidence interval). Make clear which confounders were adjusted for and why they were included | 9, 10 |
|                          |    | (b) Report category boundaries when continuous variables were categorized                                                                                                                                    |       |
|                          |    | (c) If relevant, consider translating estimates of relative risk into absolute risk for a meaningful time period                                                                                             |       |
| Other analyses           | 17 | Report other analyses done—eg analyses of subgroups and interactions, and sensitivity analyses                                                                                                               | 9, 10 |
| <b>Discussion</b>        |    |                                                                                                                                                                                                              |       |
| Key results              | 18 | Summarise key results with reference to study objectives                                                                                                                                                     | 12    |
| Limitations              | 19 | Discuss limitations of the study, taking into account sources of potential bias or imprecision. Discuss both direction and magnitude of any potential bias                                                   | 13,14 |
| Interpretation           | 20 | Give a cautious overall interpretation of results considering objectives, limitations, multiplicity of analyses, results from similar studies, and other relevant evidence                                   | 14    |
| Generalisability         | 21 | Discuss the generalisability (external validity) of the study results                                                                                                                                        | 13,14 |
| <b>Other information</b> |    |                                                                                                                                                                                                              |       |
| Funding                  | 22 | Give the source of funding and the role of the funders for the present study and, if applicable, for the original study on which the present article is based                                                | 17    |

\*Give information separately for exposed and unexposed groups.

**Note:** An Explanation and Elaboration article discusses each checklist item and gives methodological background and published examples of transparent reporting. The STROBE checklist is best used in conjunction with this article (freely available on the Web sites of PLoS Medicine at <http://www.plosmedicine.org/>, Annals of Internal Medicine at <http://www.annals.org/>, and Epidemiology at <http://www.epidem.com/>). Information on the STROBE Initiative is available at <http://www.strobe-statement.org>.
